# Supplementary material for: Global forest fragmentation change from 2000 to 2020
Source: PubMed Central journal article supplement (PMC10336092; doi:10.1038/s41467-023-39221-x), 2023-07-11
Supplement: 41467_2023_39221_MOESM1_ESM.pdf [file 41467_2023_39221_MOESM1_ESM.pdf]

1 **Supplementary Information for**  
2 **Global forest fragmentation change from 2000 to 2020**

3

4 Jun Ma<sup>#, \*</sup>, Jiawei Li<sup>#</sup>, Wanben Wu & Jiajia Liu<sup>\*</sup>

5

6 Ministry of Education Key Laboratory for Biodiversity Science and Ecological Engineering,  
7 Coastal Ecosystems Research Station of the Yangtze River Estuary, Institute of Biodiversity  
8 Science, School of Life Sciences, Fudan University, #2005 Songhu Road, Shanghai, 200438,  
9 China.

10

11 <sup>#</sup> These authors contributed equally to this work.

12

13 <sup>\*</sup> Corresponding author:

14 Jun Ma, ma\_jun@fudan.edu.cn

15 Jiajia Liu, liujiajia@fudan.edu.cn

16

17 **The Supplementary Information contains Supplementary Figures 1-8 and**  
18 **Supplementary Note 1.**

19 **Supplementary Figures**

20

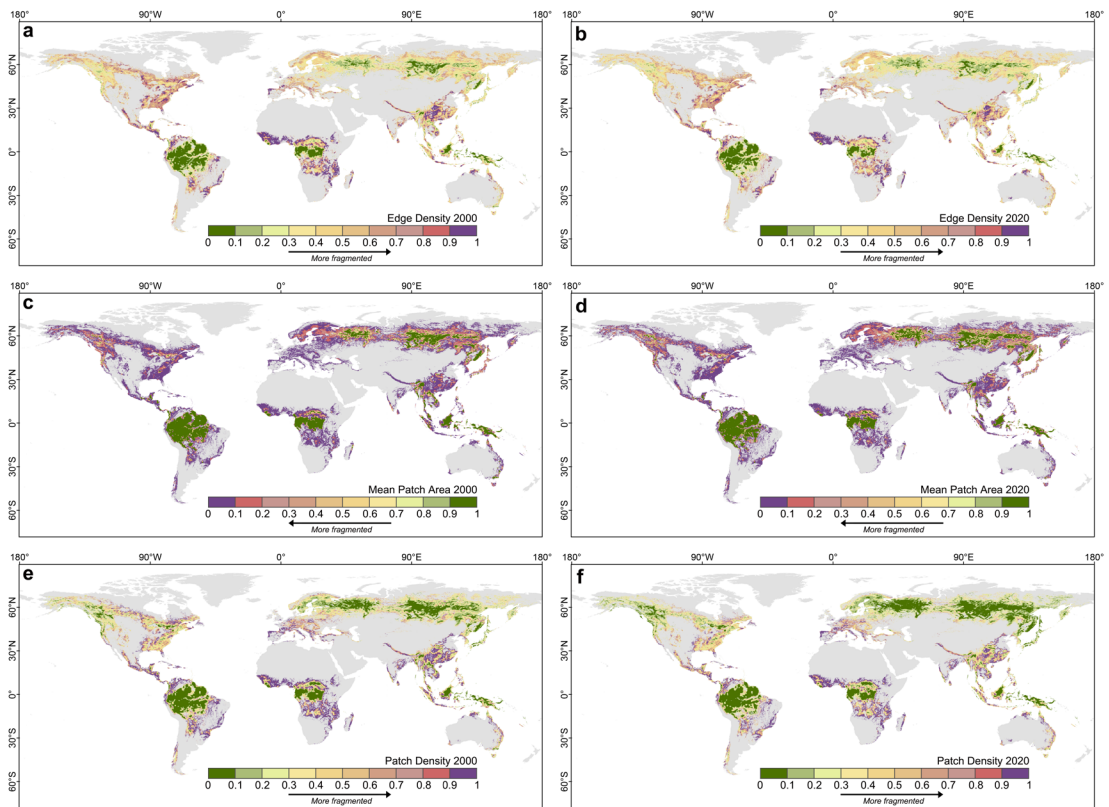

21

22 **Supplementary Fig. 1** | The spatial distribution of **(a-b)** edge density (ED), **(c-d)** mean  
23 patch area (MPA), and **(e-f)** patch density (PD) for global forest landscapes in 2000 and  
24 2020. The range of values for each landscape pattern index is 0-1. More details of the  
25 specific calculation formulas were mentioned in the Methods section of the main text  
26 and Extended methods section of the Supplementary Information.

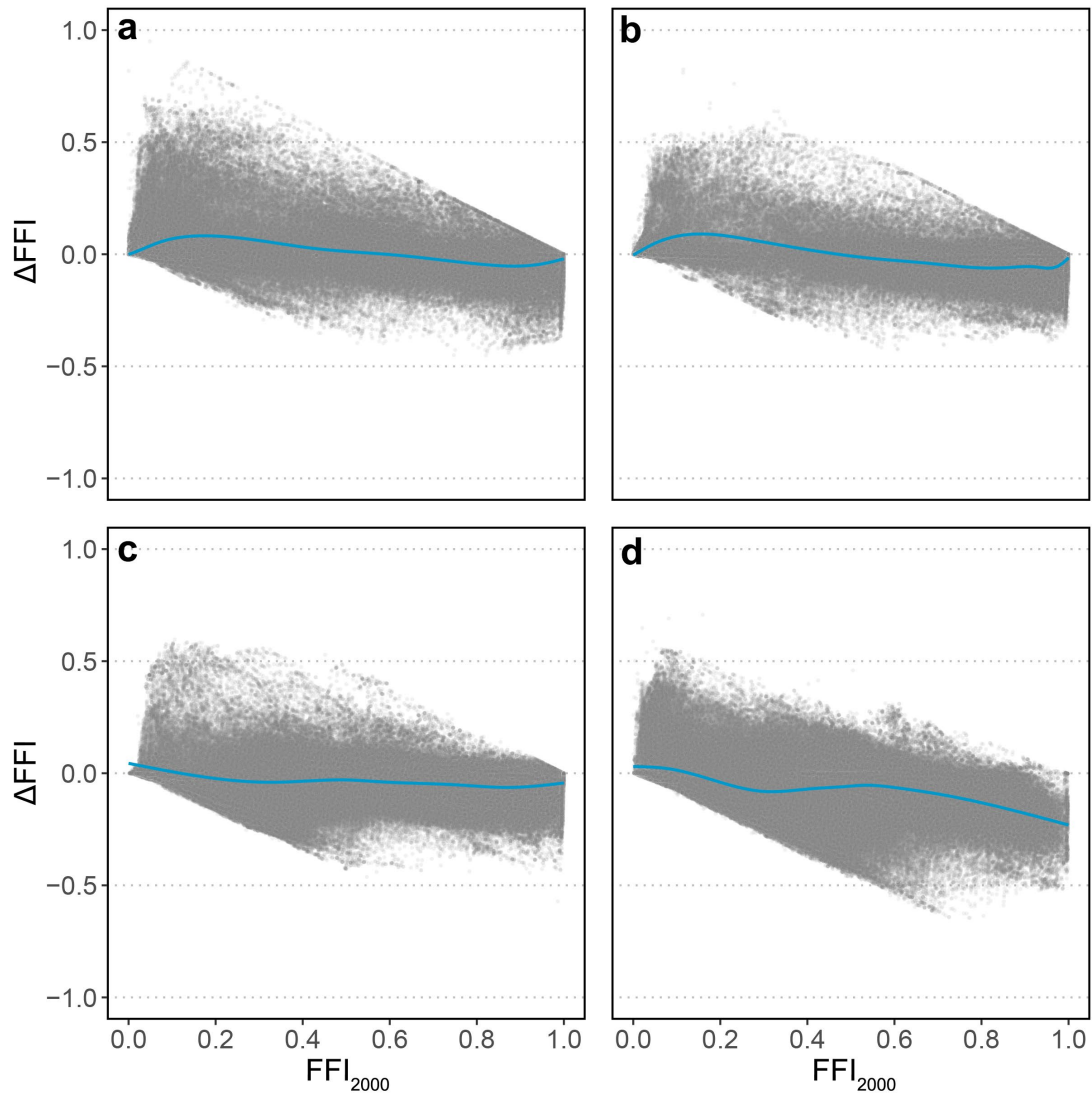

27

28 **Supplementary Fig. 2** | The relationships between the static forest fragmentation index  
 29 ( $FFI_{2000}$ ) and the dynamic forest fragmentation index during 2000-2020 ( $\Delta FFI$ ) for **(a)**  
 30 **Tropical zone**, **(b)** Subtropical zone, **(c)** Temperate zone, and **(d)** Boreal zone. The blue  
 31 curve was plotted using the generalized additive model (GAM) method. The darker the  
 32 color of the dots indicated the more dots in this region.

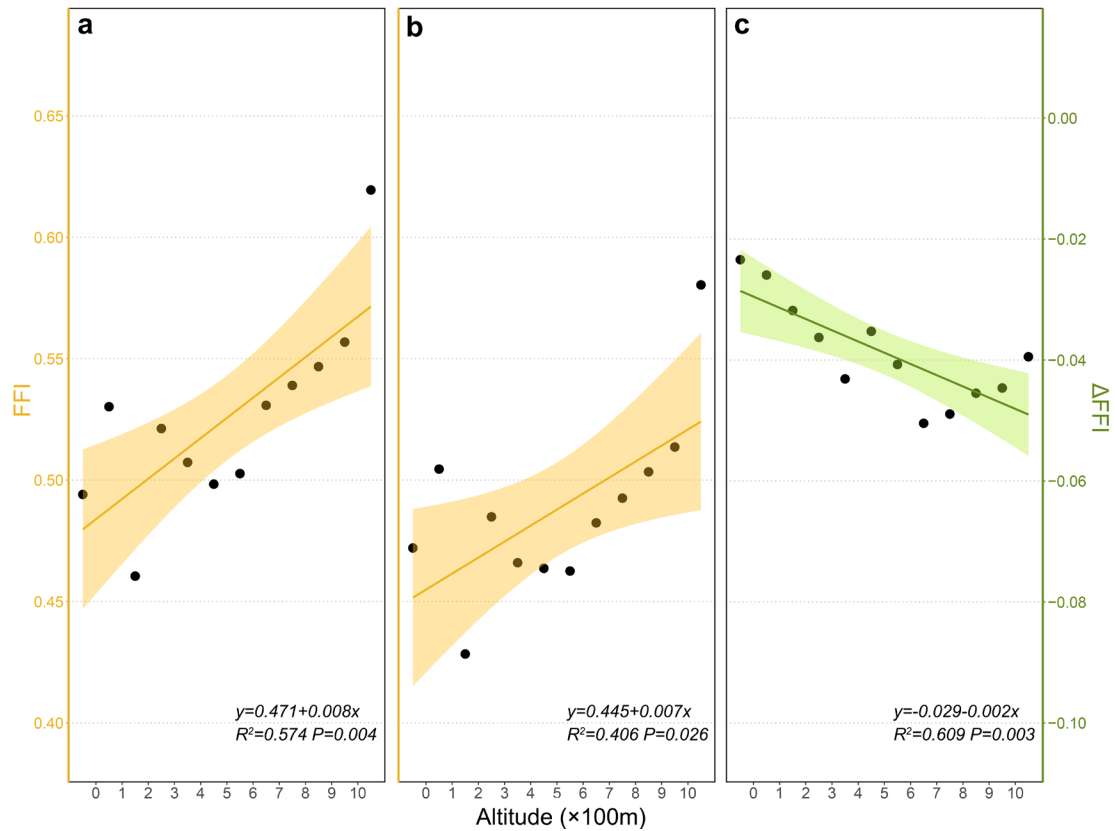

33

34 **Supplementary Fig. 3** | The relationships between (a-b) the static forest fragmentation  
 35 indexes (FFI<sub>2000</sub> and FFI<sub>2020</sub>; orange) and (c) the dynamic forest fragmentation index  
 36 during 2000-2020 ( $\Delta$ FFI; green) with altitude gradient. The black dots indicated the  
 37 mean value of FFIs and  $\Delta$ FFI in each 100m altitude interval. The dark-colored lines  
 38 indicated the one-dimensional linear regression curve and the light-colored error bands  
 39 indicated the 95% confidence intervals of the fitted models based on these black dots.  
 40 The corresponding y-axis labels were the same color as the fitted curve. The statistical  
 41 significance in (a-c) was obtained with a two-side Student's T-test and the relevant  
 42 parameters of the models were indicated.

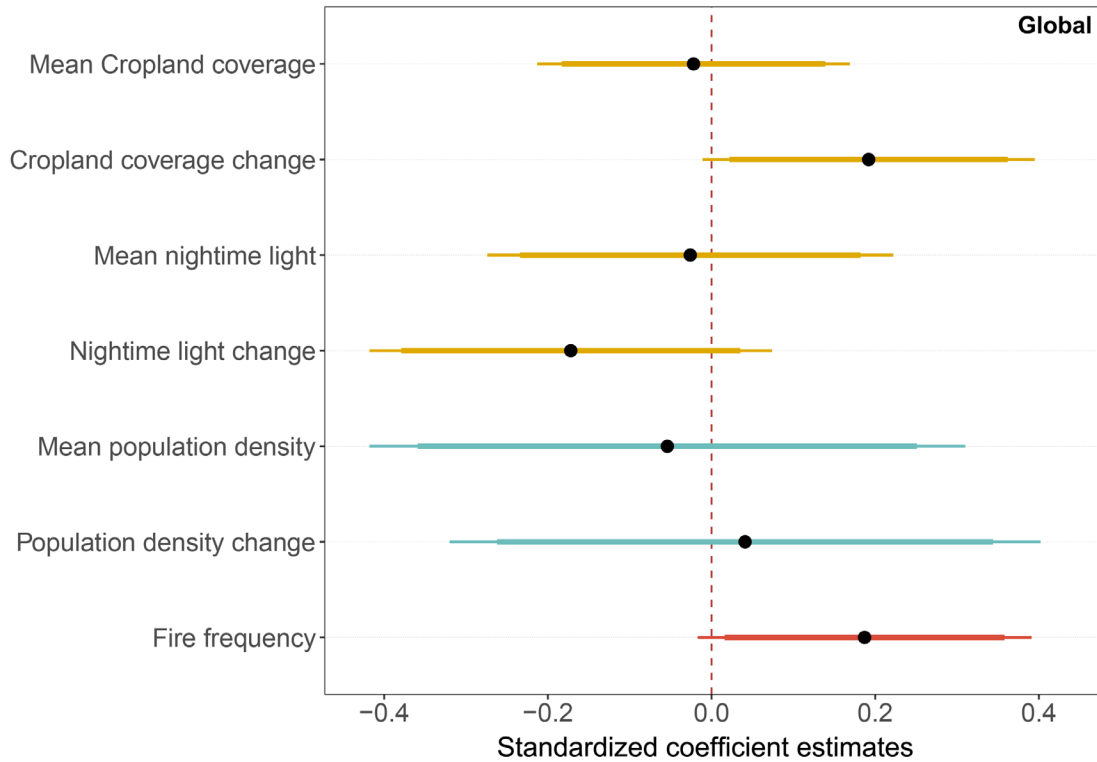

43

44 **Supplementary Fig. 4** | Standardized correlation coefficients of the dynamic forest  
 45 fragmentation index ( $\Delta$ FFI) for the globe. Relative effects of anthropogenic activity  
 46 (the mean and difference values of cropland coverage and nighttime light; yellow color),  
 47 demographic pressure (the mean and difference values of population density; blue  
 48 color), and natural disturbance (fire frequency; red color) on dynamics of  $\Delta$ FFI of all  
 49 forested countries (n=131 countries). The dots represented standardized coefficient  
 50 estimates with 95% (thin segments,  $\pm 1.960$  standard errors) and 90% (thick segments,  
 51  $\pm 1.645$  standard errors) confidence intervals in generalized linear models.

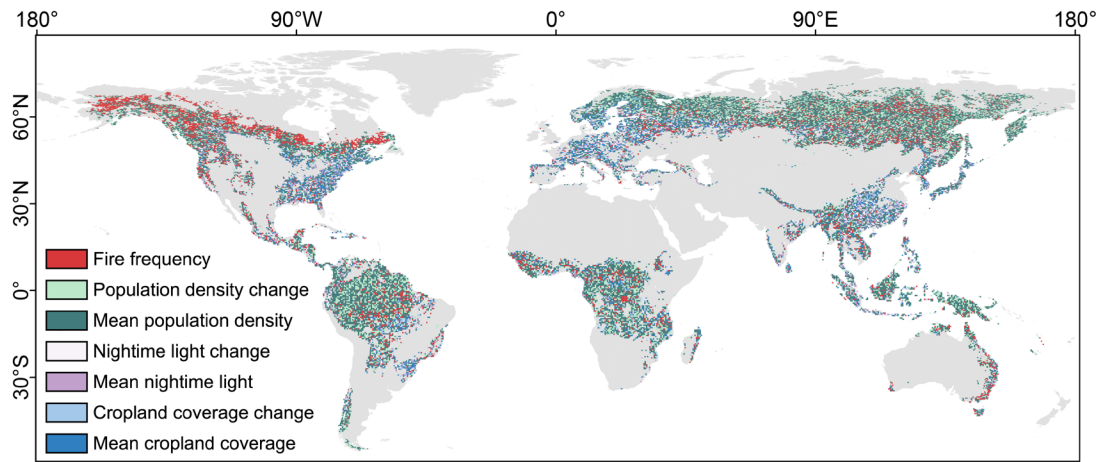

52

53

54

55

56

**Supplementary Fig. 5** | Primary drivers of the dynamic forest fragmentation index ( $\Delta\text{FFI}$ ) for the period 2000 to 2020. The primary driver factor for each 50 km grid was represented by the factor with the highest absolute value of standardized coefficient estimates.

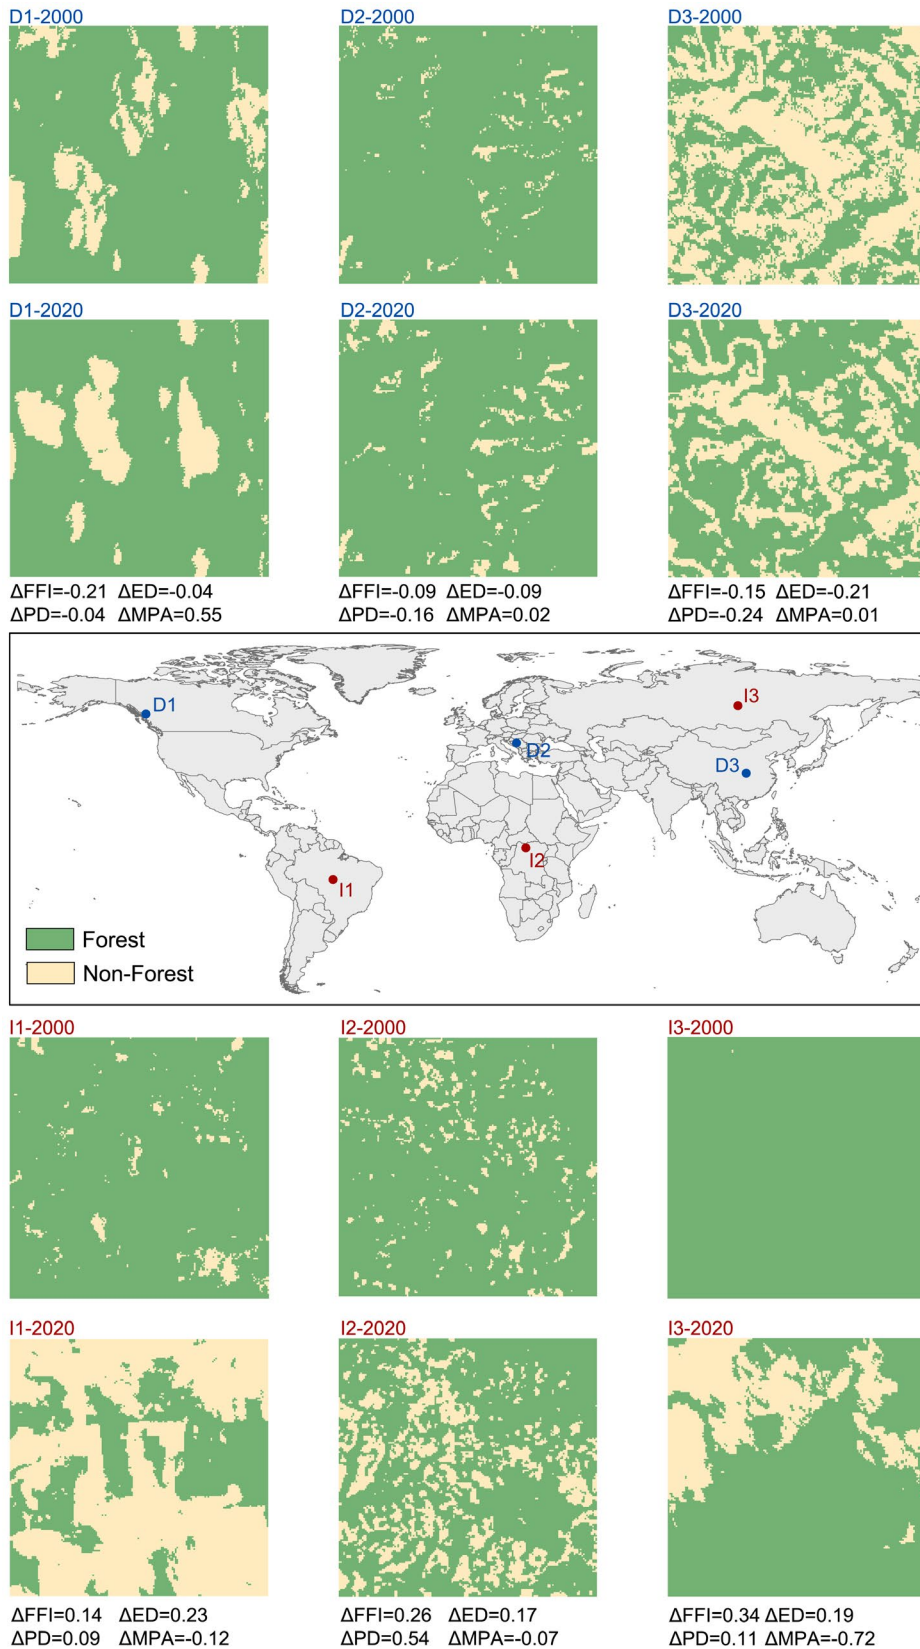

57

58 **Supplementary Fig. 6** | Spatial distribution of full resolution of forest cover change  
 59 from 2000 to 2020 for some sites of different locations of the globe. Each of the site is  
 60 a 5 km size grid and was selected in relevant hotspots in forest fragmentation decreased  
 61 and increased areas of **Fig. 2**.

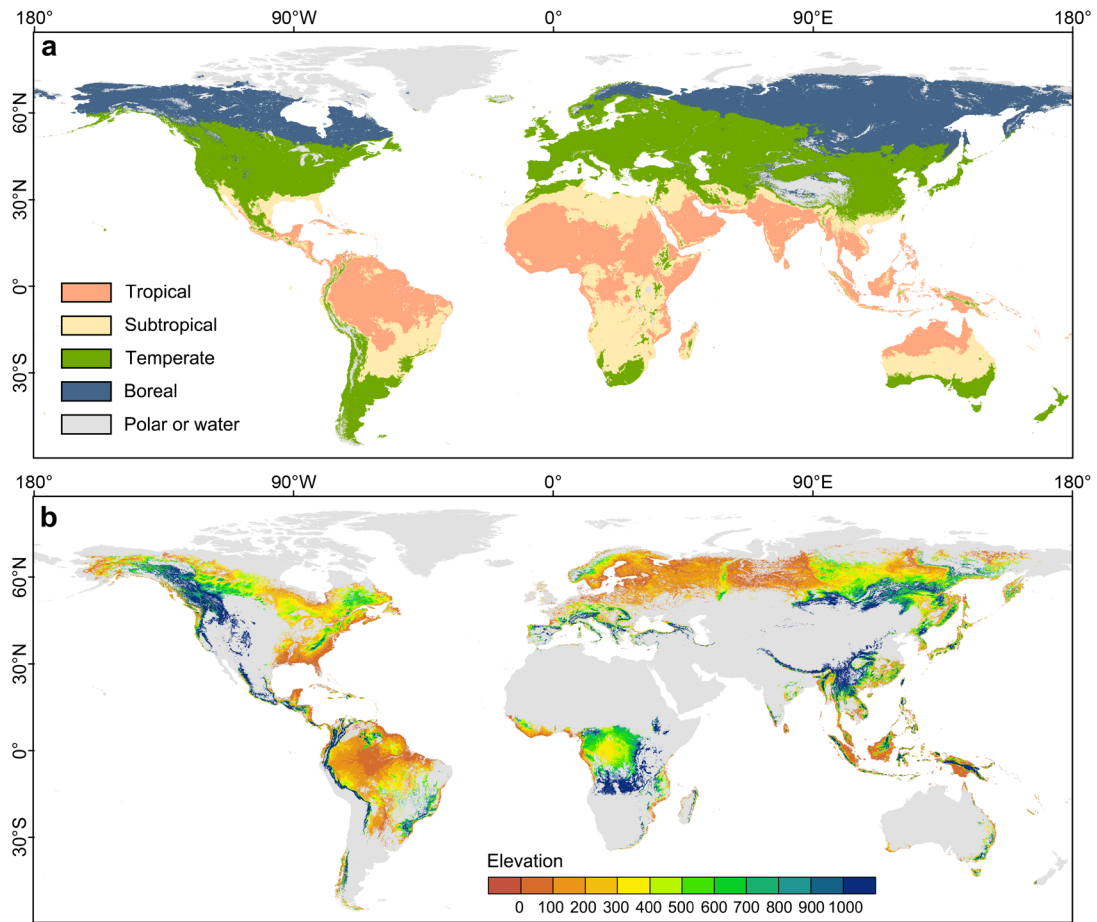

62

63 **Supplementary Fig. 7 | (a) Global climate zones map and (b) elevation map for forest**  
 64 **area. The sources of these data were described in detail in the Methods section of the**  
 65 **main text.**



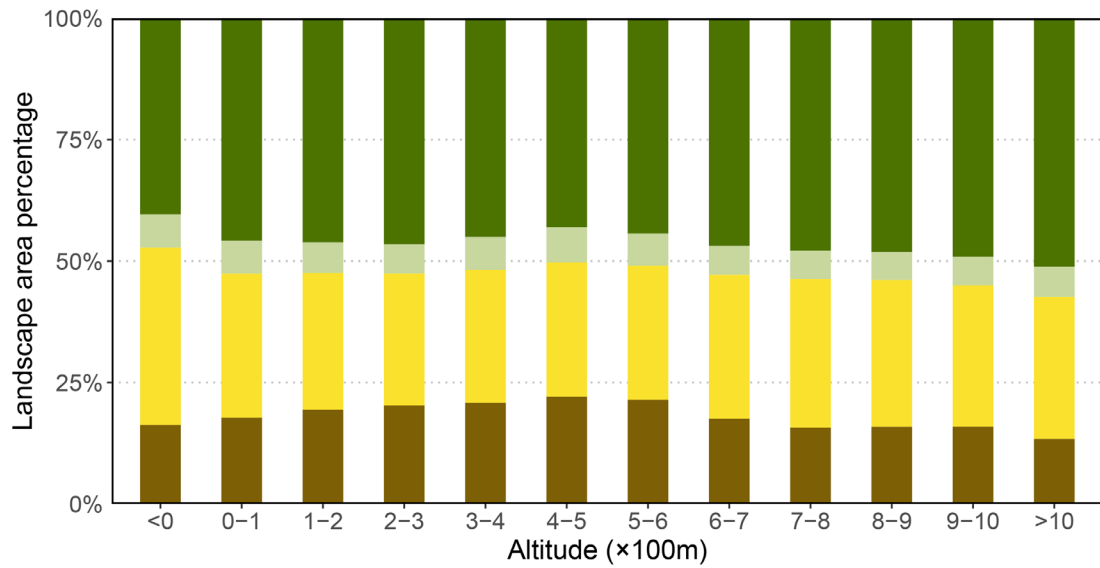

66

67 **Supplementary Fig. 8** | The area percentage of four-forest landscape dynamic patterns  
 68 in altitudinal gradient. The brown bars indicated FC<sub>down</sub>FFI<sup>up</sup> ( $\Delta FC < 0$  and  $\Delta FFI > 0$ ),  
 69 the yellow bars indicated FC<sub>down</sub>FFI<sub>down</sub> ( $\Delta FC < 0$  and  $\Delta FFI < 0$ ), the light green bars  
 70 indicated FC<sup>up</sup>FFI<sup>up</sup> ( $\Delta FC > 0$  and  $\Delta FFI > 0$ ) and the dark green bars indicated  
 71 FC<sup>up</sup>FFI<sub>down</sub> ( $\Delta FC > 0$  and  $\Delta FFI < 0$ ). The specific classification was described in detail  
 72 in the Methods section of the main text.

73 **Supplementary Note 1**

74 **The specific processes for the calculation of the static forest fragmentation index**

75 We constructed a synthesized forest fragmentation index (FFI) using the normalized  
76 single fragmentation metrics. During the normalization of ED, PD, and MPA, both the  
77 directions of the three metrics in reflecting forest fragmentation and the comparability  
78 of the FFI in different years were considered. The upper and lower limit values of the  
79 landscape pattern metrics in 2020 were first obtained to identify outliers based on the  
80 formula as follows:

81 
$$Q_{upper} = Q_3 + 1.5IQR (1)$$

82 
$$Q_{lower} = Q_1 - 1.5IQR (2)$$

83 where  $Q_{upper}$  and  $Q_{lower}$  represent the upper and lower limit values for each landscape  
84 pattern metric, respectively;  $Q_1$  is the first quartile (lower quartile);  $Q_3$  is the third  
85 quartile (upper quartile) of each landscape pattern metric after equal division into  
86 quartiles; and  $IQR$  denotes the quartile distance, i.e., the difference between  $Q_3$  and  $Q_1$ .  
87 This method can represent the distribution of the data more realistically and intuitively  
88 because landscape pattern metrics did not obey the normal distribution. We set the pixel  
89 values that were beyond the upper and lower limits as the corresponding limit values to  
90 exclude the influence of extreme outliers of the data.

91 Then, taking the upper and lower limit values established for 2020 as the standard,  
92 the values for 2000 were processed similarly so that the data from the two years could  
93 be compared horizontally. The normalization was carried out using the following  
94 equation:

95 
$$Y_{nor} = \frac{X - X_{min}}{X_{max} - X_{min}} (3)$$

96 where  $Y_{nor}$  represents the normalized results for ED, PD and MPA with a range of 0-1,  
97  $X$  is the original value of ED, PD or MPA, and  $X_{max}$  and  $X_{min}$  are the corresponding  
98 maximum and minimum values, respectively.

99 Finally, the three landscape pattern metrics were jointly used to construct the static  
100 forest fragmentation index (FFI) with average weight:

101 
$$FFI_k = \frac{ED_{nor} + PD_{nor} + (1 - MPA_{nor})}{3} \quad (4)$$

102 where  $k$  is the specific year and  $FFI_k$  is the static forest fragmentation index with a range  
103 of 0-1. We then defined three levels of global forest fragmentation: low (0-0.2), medium  
104 (0.2-0.8) and high (0.8-1).
