# Supplementary material for: Global forest fragmentation change from 2000 to 2020
Source: PubMed Central journal article supplement (PMC10336092; doi:10.1038/s41467-023-39221-x), 2023-07-11
Supplement: 41467_2023_39221_MOESM3_ESM.pdf [file 41467_2023_39221_MOESM3_ESM.pdf]

## **Description of additional supplementary files**

Supplementary Data 1: Mean values of the changes in forest coverage ( $\Delta FC$ ) during 2000-2020, the dynamic forest fragmentation index ( $\Delta FFI$ ) during 2000-2020, the static forest fragmentation indexes ( $FFI_{2000}$  and  $FFI_{2020}$ ) in 131 countries around the world.
